# Supplementary material for: Treatment of Aniline Wastewater by Membrane Distillation and Crystallization
Source: MDPI journal article supplement (doi:10.3390/membranes13060561), 2023-05-30
Supplement: s1 [file s1]

# Supplementary information

**Table S1.** Organic content in aniline wastewater.

| Retention time/min | Chemical compound                | Molecular formula                                | Boiling point/ °C | Molecular weight/Da |
|--------------------|----------------------------------|--------------------------------------------------|-------------------|---------------------|
| 6.175              | aniline                          | C <sub>6</sub> H <sub>7</sub> N                  | 184.4             | 93                  |
| 7.344              | 2,4,6-trimethyldecane            | C <sub>13</sub> H <sub>28</sub>                  | 204.3             | 184                 |
| 8.999              | Cyclohexyldimethoxymethylsilane  | C <sub>9</sub> H <sub>20</sub> O <sub>2</sub> Si | 201.2             | 188                 |
| 10.444             | 2,6,10,14-tetramethylheptadecane | C <sub>21</sub> H <sub>44</sub>                  | 356.9             | 296                 |
| 10.672             | N-pentadecane                    | C <sub>15</sub> H <sub>32</sub>                  | 270.0             | 212                 |
| 16.304             | 2,6,10,15-tetramethylheptadecane | C <sub>21</sub> H <sub>44</sub>                  | 356.9             | 296                 |
| 21.190             | Triphenylphosphine oxide         | C <sub>18</sub> H <sub>15</sub> OP               | 360.0             | 278                 |

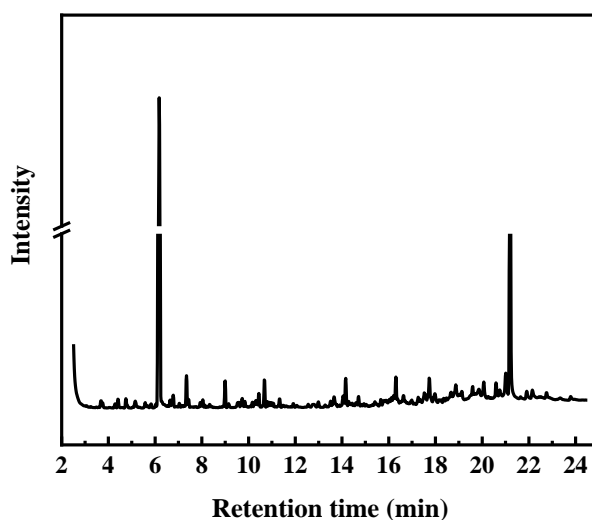

Figure S1 GC-MS spectrum of aniline wastewater.

As we can see, the pore size distribution of the fouled membrane at 0.25  $\mu\text{m}$ -0.30  $\mu\text{m}$  was reduced comparing the original membrane, this is because after the 15h MD operation, the membrane surface was polluted and some membrane pores were blocked, which can also explain that the flux in Figure 3 (b) began to decline at 15h.

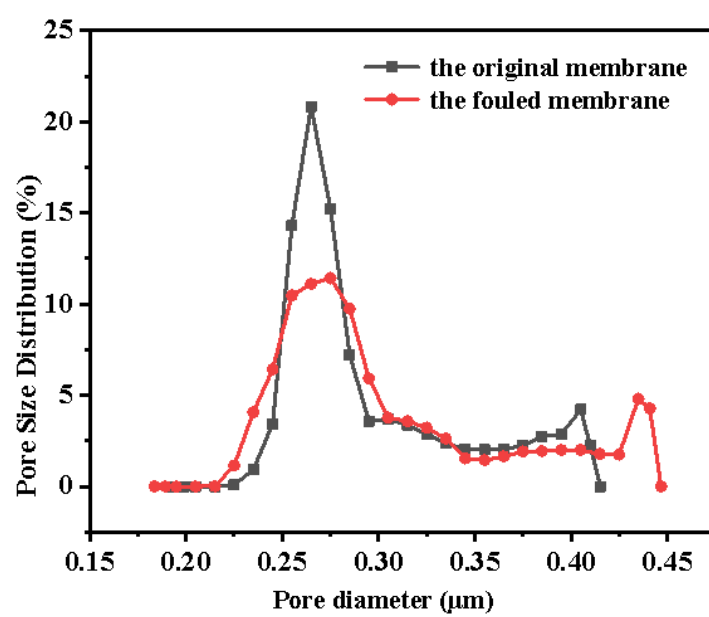

Figure S2. The pore size distribution of the original membrane and the fouled membrane.
